# Supplementary material for: Placental Transmission of Human Parvovirus 4 in Newborns with Hydrops, Taiwan
Source: PubMed Central journal article supplement (PMC3310659; doi:10.3201/eid1710.101841), 2011-10
Supplement: 10-1841-Techapp_2p.pdf [file 10-1841-Techapp_2p.pdf]

# Placental Transmission of Human Parvovirus 4 in Newborns with Hydrops Fetalis, Taiwan

## Technical Appendix

### Blood Samples

Infants with nonimmune idiopathic hydrops fetalis are not routinely checked for parvovirus B19 infection. That is why only 6 cases were available for the present study. Other causes of hydrops had been excluded, such as genetic causes and cardiovascular abnormalities. None of the 6 mothers was an injection drug user.

### Methods

#### B19 Recombinant Fusion Proteins

Two B19 proteins were made, viral protein VP1S (VP1-specific, VP1 aa 1–227) and VP2N (N-terminal of B19 VP2, aa 1–343). VP1S fragment was produced by PCR by using plasma B19 DNA from HIV-1–infected patient CH (1) as template. The primers used were VP1S sense 5'-CTCGAGATGAGTAAAGAAAGTGGCAA (nt 2444–2463, number according to Au isolate, Xho I restriction enzyme site at 5'), VP1S antisense 5'-GAATTCGCTTGGGTATTTTCTGAGGC (nt 3124–3104, EcoRI enzyme site at 5'), VP2N sense (nt 3125–3144) 5'-ATGACTTCAGTTAATTCTGC and VP2N antisense (nt 4159–4136) 5'-TTATTTATCTGTGTCCCAGTGGTG. The cycling conditions were: 94°C for 2 min, followed by 35 cycles of 94°C for 30 sec, 55°C for 30 seconds, 72°C for 2 min, and a final extension of 7 min at 72°C. VP1S PCR product was cloned by TA cloning kit (pCRII Invitrogen, Carlsbad, CA, USA). The cloned VP1S gene was cleaved out by restriction enzyme Eco RI and Xho I and then ligated to pThioHis A protein expressing vector (Invitrogen). The VP2N PCR product was ligated to pET SUMO vector (Invitrogen). The production and purification of recombinant fusion proteins were done according to manufacturer's manuals.

## **B19 Immunoblot**

The immunoblot method was the same as PARV4 immunoblot (2).

## **B19 PCR**

DNA was extracted from 200 µL plasma by using High Pure Viral Nucleic Acid Kit (Roche, Mannheim, Germany). The final elution volume was 50 µl, and 5 µL was used in the reaction. B19 DNA was detected by nested PCR. The primers were P1f, P1r, n-P1f and n-P1r (3). The cycling conditions were: 94oC for 2 minute, followed by 35 cycles of 94oC for 30 sec, 55 oC for 30 sec, 72 oC for 30 sec, and a final extension of 2 min at 72 oC. The PCR products were purified by QIAquick PCR purification kit (QIAGEN) and sequenced by DyeDeoxy Terminator Cycle Sequencing Kit (Applied Biosystems).

## **References**

1. Hung CC, Sheng WH, Lee KL, Yang SJ, Chen MY. Genetic drift of parvovirus B19 is found in AIDS patients with persistent B19 infection. *J Med Virol.* 2006;78:1374–84. [PubMed](#)  
[doi:10.1002/jmv.20708](https://doi.org/10.1002/jmv.20708)
2. Yang SJ, Hung CC, Chang SY, Lee KL, Chen MY. Immunoglobulin G and M antibodies to human parvovirus 4 (PARV4) are frequently detected in patients with HIV-1 Infection. *J Clin Virol.* 2011;51:64–7. [PubMed](#) [doi:10.1016/j.jcv.2011.01.017](https://doi.org/10.1016/j.jcv.2011.01.017)
3. Toan NL, Duechting A, Kremsner PG, Song LH, Ebinger M, Aberle S, et al. Phylogenetic analysis of human parvovirus B19, indicating two subgroups of genotype 1 in Vietnamese patients. *J Gen Virol.* 2006;87:2941–9. [PubMed](#) [doi:10.1099/vir.0.82037-0](https://doi.org/10.1099/vir.0.82037-0)
